# Supplementary material for: Effect of Modified Vaccinia Ankara–5T4 and Low-Dose Cyclophosphamide on Antitumor Immunity in Metastatic Colorectal Cancer: A Randomized Clinical Trial
Source: PubMed Central journal article supplement (PMC5824319; doi:10.1001/jamaoncol.2017.2579), 2017-09-07
Supplement: jamaoncol-3-524-s001.pdf [file jamaoncol-3-524-s001.pdf]

1

**A PILOT STUDY TO ASSESS THE EFFECT OF REGULATORY T CELL DEPLETION ON 5T4-CONTAINING MVA (TROVAX®) VACCINATION IN PATIENTS WITH INOPERABLE METASTATIC COLORECTAL CANCER**

2

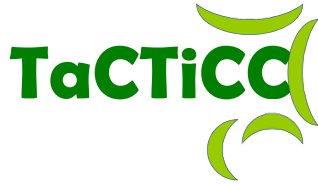

**TroVax® and Cyclophosphamide Treatment in Colorectal Cancer**

3

|                                   |                    |                |
|-----------------------------------|--------------------|----------------|
| Protocol version number and date: | V 5 November 2012  |                |
| Sponsor:                          | Cardiff University |                |
| Trial Identifiers:                | EudraCT number:    | 2010-024380-41 |
|                                   | ISRCTN:            | ISRCTN54669986 |
|                                   | Protocol Number:   | SPON868-10     |
|                                   | GTAC Number:       | GTAC 175       |

4

5

6

7

8

9

10

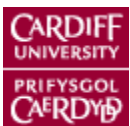

11

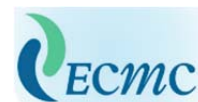

12

**TRIAL MANAGEMENT GROUP**

| <b>Chief Investigator</b>                                                                                                                                                                                  | <b>Clinical Collaborators</b>                                                                                                                                                                          |                                                                                                                                                           |
|------------------------------------------------------------------------------------------------------------------------------------------------------------------------------------------------------------|--------------------------------------------------------------------------------------------------------------------------------------------------------------------------------------------------------|-----------------------------------------------------------------------------------------------------------------------------------------------------------|
| <p>Dr Andrew Godkin<br/>Address; Institute of Infection &amp; Immunity, Henry Wellcome Building, Heath Park, Cardiff CF14 4XN<br/>Telephone: 02920 687304 / 029 206 87003<br/>Email: godkinaj@cf.ac.uk</p> | <p>Dr Robert Jones<br/>(co-investigator and lead clinical oncologist)<br/>Address: Velindre Hospital, Whitchurch, Cardiff, CF14 2TL<br/>Telephone: 029 2061 6560<br/>Email: Jonesrh7@cardiff.ac.uk</p> | <p>Dr Richard Adams<br/>Address: Velindre Hospital, Whitchurch, Cardiff, CF14 2TL<br/>Telephone: 029 2061 5888 ext 6206<br/>E-mail: AdamsRA3@cf.ac.uk</p> |
| <b>Clinical Research Fellow</b>                                                                                                                                                                            | <b>Research Fellow</b>                                                                                                                                                                                 |                                                                                                                                                           |
| <p>Dr Thomas Pembroke<br/>Address: Institute of Infection &amp; Immunity, Henry Wellcome Building, Heath Park, Cardiff CF14 4XN<br/>Email: PembrokeT@cf.ac.uk</p>                                          | <p>Martin Scurr<br/>Address; Institute of Infection &amp; Immunity, Henry Wellcome Building, Heath Park, Cardiff CF14 4XN<br/>Email: scurrmj@cardiff.ac.uk</p>                                         |                                                                                                                                                           |
| <b>Statistics &amp; Data Management</b>                                                                                                                                                                    |                                                                                                                                                                                                        |                                                                                                                                                           |
| <p>Dr Robert Hills<br/>Address: Department of Haematology, Cardiff University School of Medicine, Cardiff CF14 4XN<br/>Telephone: 02920 744647<br/>Fax: 029 2047 4655<br/>Email: hillsrk@cf.ac.uk</p>      | <p>Dr Awen Gallimore<br/>Address: Institute of Infection &amp; Immunity, Henry Wellcome Building, Heath Park, Cardiff CF14 4XN<br/>Telephone: 02920 687012<br/>Email: gallimoream@cf.ac.uk</p>         |                                                                                                                                                           |

| Pharmacy                                                                                                                                                                                                                                       | Operational                                                                                                                                                                                                                                                                                                      | Trial Management                                                                                                                                                                                                                                                  |
|------------------------------------------------------------------------------------------------------------------------------------------------------------------------------------------------------------------------------------------------|------------------------------------------------------------------------------------------------------------------------------------------------------------------------------------------------------------------------------------------------------------------------------------------------------------------|-------------------------------------------------------------------------------------------------------------------------------------------------------------------------------------------------------------------------------------------------------------------|
| <p>Kathryn Bethune (pharmacist)<br/> Address: Pharmacy Department,<br/> University Hospital of Wales,<br/> Heath Park, Cardiff CF14 4XW<br/> Telephone: 02920 742991<br/> Fax: 02920 744375<br/> E-mail:<br/> Kathryn.Bethune@wales.nhs.uk</p> | <p>Dr Kathrine Craig<br/> (operational director of the<br/> Clinical Research Facility)<br/> Address: Clinical Research<br/> Facility. Upper Ground Floor C<br/> Block, University Hospital of<br/> Wales, Heath Park, Cardiff<br/> CF14 4XW<br/> Telephone: 02920 748251<br/> E-mail: craigkj@cardiff.ac.uk</p> | <p>Helen Clark (trial manager)<br/> Address: Cancer Trials Unit. TB2<br/> Room 20, University Hospital of<br/> Wales, Cardiff University, Heath<br/> Park, Cardiff, CF14 4XN<br/> Telephone: 02920 745397<br/> Fax: 02920 742289<br/> Email: clarkh3@cf.ac.uk</p> |
| <b>Other clinical collaborators</b>                                                                                                                                                                                                            |                                                                                                                                                                                                                                                                                                                  |                                                                                                                                                                                                                                                                   |
| <p>Dr Seema Arif<br/> Address: Velindre Hospital,<br/> Whitchurch, Cardiff, CF14 2TL<br/> Telephone: 029 2061 5888 ext<br/> 6184<br/> E-mail: seema.arif@velindre-<br/> tr.wales.nhs.uk</p>                                                    | <p>Dr Tom Crosby<br/> Address: Velindre Hospital,<br/> Whitchurch, Cardiff, CF14 2TL<br/> Telephone: 029 2061 5888 ext<br/> 6202<br/> E-mail: tom.crosby@velindre-<br/> tr.wales.nhs.uk</p>                                                                                                                      | <p>Dr Alison Brewster<br/> Address: Velindre Hospital,<br/> Whitchurch, Cardiff, CF14 2TL<br/> Telephone: 029 2061 5888 ext<br/> 6220<br/> E-mail: Alison.brewster@velindre-<br/> tr.wales.nhs.uk</p>                                                             |

15 **KEY CONTACTS**

16 Randomisations:

17 HCTU Trials Office: 02920 74 8976/5397

18

19 Eligibility queries:

20 Dr Andrew Godkin: 02920 687304/687003/744879

21 Dr Robert Jones: 02920 616560

22 Dr Richard Adams 02920 615888 ext 6206

23

24 Clinical queries:

25 Dr Andrew Godkin: 02920 687304/687003/744879, or

26 Dr Robert Jones: 02920 616560

27

28 All Other queries:

29 HCTU Trials Office: 02920 74 8976/5397

30 **TRIAL SUMMARY**

31

32 Rationale

33 Colorectal cancer (CRC) is the third most common malignant disease in Western  
34 Europe. In the Cardiff and Vale University Health Board alone, 250 cases present  
35 each year. The current care of patients revolves around excision of the tumour,  
36 staging, and adjuvant 5-fluorouracil (5FU) or capecitabine based treatment for locally  
37 spreading disease, or as palliative chemotherapy for patients with advanced  
38 metastatic disease. Despite these advances, colorectal cancer remains the second  
39 leading cause of death from cancer in Wales. Chemotherapy has a significant  
40 morbidity and mortality associated with its use. We aim to build on our research to  
41 develop less toxic immunoadjuvants to treat patients.

42

43 It is now accepted that immune responses can be directed to antigens expressed in  
44 tumours (tumour-associated antigens or TAA) and control or kill the tumour. Our  
45 research in Cardiff indicates that CRC drives the expansion of a specific regulatory T  
46 cell (Treg) population which controls anti-tumour immune responses to the detriment  
47 of the patient. We have found that patients have an increased frequency of Tregs  
48 compared to controls, and that these Tregs specifically inhibited anti-tumour immune  
49 responses directed to the TAAs e.g.5T4 (an oncofetal antigen).

50

51 Methods

52 This study will assess the efficacy of using either cyclophosphamide, or a pox virus  
53 based vaccine containing the tumour antigen 5T4 called TroVax<sup>®</sup> (Oxford BioMedica),  
54 or both, in a 2x2 factorial design to deplete T-regs and enhance an immune response  
55 following completion of an initial 12 weeks of palliative chemotherapy. Patients who  
56 have inoperable metastatic disease will be recruited.

57

58 Blood samples will be obtained to measure anti-tumour immune responses and

59 lymphocyte subset phenotype in the laboratory using established techniques.

60

61 Although the study is not powered to measure a difference in clinical outcome, clinical  
62 parameters will be recorded to try to establish a correlation between immune  
63 responses and clinical outcome.

64

#### 65 Primary Objective

66

67 i) to measure the effect of treatment with TroVax<sup>®</sup> and/or cyclophosphamide on anti-  
68 tumour immune responses in patients with colorectal cancer

69

#### 70 Secondary Objectives

71 i) to investigate whether there is an improvement in Overall Survival (OS) in the  
72 patients treated with TroVax<sup>®</sup> and/or cyclophosphamide versus not receiving the  
73 experimental therapy

74 ii) to investigate whether Time To Progression (TTP)<sup>1</sup> with death as a competing risk  
75 differs between the TroVax<sup>®</sup> and/or cyclophosphamide versus not receiving the  
76 experimental therapy

77 iii) to investigate whether Progression Free Survival (PFS)<sup>2</sup> differs between the  
78 TroVax<sup>®</sup> and/or cyclophosphamide versus not receiving the experimental therapy

79 iv) to compare adverse events, laboratory measurements and vital sign  
80 measurements among the treatment groups

81 v) to compare the efficacy of Treg depletion in the different groups

82 vi) to explore the relationships between immune response (antibody and cellular  
83 responses against the tumour antigen 5T4 and the MVA viral vector) and clinical  
84 response (progression free survival, overall survival, time to progression, tumour

---

<sup>1</sup> TTP: time to disease progression from entering the trial (exclude death from non-tumour causes)

<sup>2</sup> PFS: time to disease progression or death from any cause from entering the trial with censoring for patients lost to follow up

85 response)

86

87 Primary endpoint

88 i) the magnitude of anti-tumour (5T4) immune responses at week 7

89

90 Secondary endpoints

91 i) the kinetics of anti-tumour (5T4) immune responses

92 ii) Overall Survival

93 iii) Time To Progression

94 iv) Progression Free Survival

95 v) incidence, nature, severity, relatedness and seriousness of treatment-emergent  
96 adverse events and clinically significant abnormal laboratory results

97 vi) T-reg depletion at week 4

98

99

100 **Contents**

101 **TRIAL MANAGEMENT GROUP**..... 2

102 **KEY CONTACTS**..... 3

103 **TRIAL SUMMARY**..... 4

104 1 BACKGROUND & RATIONALE..... 9

105 2 TRIAL OBJECTIVES, ENDPOINTS & DESIGN ..... 13

106 2.1 OBJECTIVES..... 13

107 2.1.1 Primary Objective..... 13

108 2.1.2 Secondary Objectives..... 13

109 2.2 ENDPOINTS..... 14

110 2.2.1 Primary Endpoint..... 14

111 2.2.2 Secondary Endpoints ..... 14

112 2.3 TRIAL DESIGN ..... 14

113 2.4 TRIAL FLOWCHART (WEEKS 1-8)..... 16

114 3 TRIAL MEDICATION ..... 18

115 3.1 INVESTIGATIONAL MEDICINAL PRODUCT ..... 18

116 3.2 DOSING REGIMEN ..... 19

117 3.3 DRUG ACCOUNTABILITY ..... 20

118 3.4 SUBJECT COMPLIANCE..... 20

119 3.5 CONCOMITANT MEDICATION ..... 20

120 4 SELECTION & WITHDRAWAL OF TRIAL SUBJECTS..... 21

121 4.1 INCLUSION CRITERIA ..... 21

122 4.2 EXCLUSION CRITERIA ..... 21

123 4.3 SELECTION OF PARTICIPANTS ..... 23

124 4.4 RANDOMISATION PROCEDURE..... 23

125 4.5 WITHDRAWAL OF SUBJECTS ..... 24

126 4.6 EXPECTED DURATION OF TRIAL..... 24

127 5 TRIAL PROCEDURES..... 25

128 5.1 BY VISIT ..... 25

129 5.2 SAMPLE COLLECTION ..... 25

130 5.3 LABORATORY TESTS..... 26

131 6 ASSESSMENT OF EFFICACY ..... 26

132 6.1 PRIMARY EFFICACY PARAMETERS ..... 26

133 6.2 SECONDARY EFFICACY PARAMETERS ..... 26

134 6.3 PROCEDURES FOR ASSESSING / MEASURING EFFICACY PARAMETERS..... 27

135 6.3.1 Primary efficacy parameters..... 27

136 6.3.2 Secondary efficacy parameters ..... 28

137 7 ASSESSMENT OF SAFETY ..... 29

138 7.1 SPECIFICATION, TIMING AND RECORDING OF SAFETY PARAMETERS ..... 29

139 7.2 ADVERSE EVENT REPORTING ..... 29

140 7.2.1 Definitions 29

141 7.2.2 Reporting responsibilities ..... 31

142 7.3 TREATMENT STOPPING RULES ..... 33

143 8 STATISTICS..... 33

144 8.1 SAMPLE SIZE ..... 34

145 8.2 RANDOMISATION ..... 35

146 8.3 ANALYSIS..... 35

147 9 DATA MONITORING & ETHICS COMMITTEE ..... 35

148 10 DIRECT ACCESS TO SOURCE DATA AND DOCUMENTS..... 36

149 11 ETHICS & REGULATORY APPROVALS ..... 36

150 12 QUALITY ASSURANCE..... 37

|     |    |                                                                                                       |           |
|-----|----|-------------------------------------------------------------------------------------------------------|-----------|
| 151 | 13 | DATA HANDLING .....                                                                                   | 37        |
| 152 | 14 | PUBLICATION POLICY .....                                                                              | 38        |
| 153 | 15 | FINANCIAL ASPECTS AND INSURANCE.....                                                                  | 38        |
| 154 | 16 | REFERENCES.....                                                                                       | 39        |
| 155 | 17 | SIGNATORIES.....                                                                                      | 41        |
| 156 |    | <i>APPENDIX 1 Preparation, Administration and Handling of Investigational Medicinal Products.....</i> | <i>42</i> |
| 157 |    | <i>APPENDIX 2 Instructions for the Handling, Storage, Reconstitution and Disposal of TroVax®.....</i> | <i>46</i> |
| 158 |    | <i>APPENDIX 3 WHO Performance Status.....</i>                                                         | <i>49</i> |
| 159 |    |                                                                                                       |           |
| 160 |    |                                                                                                       |           |



161 **1 Background & Rationale**

162 Colorectal cancer (CRC) is the third most common malignant disease in Western  
163 Europe. In the Cardiff and Vale University Health Board alone, 250 cases present  
164 each year. The current care of patients revolves around excision of the tumour,  
165 staging, and adjuvant 5-fluorouracil (5FU) or capecitabine based treatment for locally  
166 spreading disease, or as palliative chemotherapy for patients with advanced  
167 metastatic disease. Chemotherapy has evolved over the last 12 years from 5FU as a  
168 sole infusional agent to a combination of 5FU or its oral pro-drugs with newer classes  
169 of drugs such as irinotecan, oxaliplatin, bevacizumab and cetuximab.

170  
171 Despite these advances, colorectal cancer remains the second leading cause of death  
172 from cancer in Wales. Chemotherapy has a significant morbidity and mortality  
173 attached to its use, and overall the long term results of this form of treatment are  
174 obviously very disappointing. We aim to build on our research outlined below to  
175 develop less toxic immunoadjuvants to treat patients.

176  
177 There is overwhelming evidence that immune responses can control and eradicate  
178 cancers. A large body of recent work from many different groups has demonstrated an  
179 increase in spontaneous and carcinogen-induced tumours in immunocompromised  
180 mice [1]. Epidemiological studies show that there is a greater relative risk compared to  
181 the general population for tumours not only associated with viral infections, but of non-  
182 viral origin (including breast, lung, pancreas, colon, renal tract and skin tumours) in  
183 individuals being treated with immunosuppressants [2].

184  
185 Multiple studies have demonstrated a better prognosis in CRC patients if the numbers  
186 of tumour infiltrating lymphocytes (TILs) is high [3]. A recent study demonstrated the  
187 remarkable observation that the degree of cytotoxic TILs in CRC was the most  
188 important factor in prognosis, irrespective of the clinicopathological staging [4].

189  
190 It is now accepted that immune responses can be directed to antigens expressed in  
191 tumours (tumour-associated antigens or TAA) and control or kill the tumour. These

192 anti-tumour responses can be adoptively transferred between animals by transferring  
193 lymphocytes from a protected to a naive animal or, in the case of humans, by  
194 expanding anti-tumour cells in vitro and infusing them back into the patient [5]. Anti-  
195 tumour immune responses may involve all branches of the immune response but the  
196 development of a robust effector CD4<sup>+</sup> T cell response appears to be essential to  
197 allow an overall broad anti-tumour immune response to develop e.g. cytotoxic and  
198 antibody responses. Recently it has been demonstrated in humans that infusing anti-  
199 tumour CD4<sup>+</sup> T cells allowed just such broad response to develop and destroy a solid  
200 tumour [6]. Individually tailored approaches are logistically impractical on a population  
201 basis and hence our interest is in developing widely applicable strategies.

202

203 Our research in Cardiff indicates that CRC drives the expansion of a specific  
204 regulatory T cell population that controls anti-tumour immune responses to the  
205 detriment of the patient.

206

207 The increasing success of immunotherapy for diseases such as melanoma, renal cell  
208 cancer, and breast cancer reflects a better understanding of factors involved in  
209 preventing anti-tumour immune responses. Much interest has recently been generated  
210 in the role of a naturally occurring population of CD4<sup>+</sup>CD25<sup>+</sup> regulatory T cells (Tregs)  
211 characterised by expression of the transcription factor FoxP3, in controlling self-  
212 antigen specific responses in the periphery, and in controlling / preventing anti-tumour  
213 immune responses [7]. Dr Godkin, running a laboratory in partnership with another  
214 Cardiff University Reader with a Wellcome Trust University Award, Dr Gallimore, has  
215 had an interest in Tregs for several years. Dr Gallimore first demonstrated in murine  
216 models that depletion of Tregs can abrogate immunological non-responsiveness to  
217 syngeneic tumours *in vivo*, and allow a striking and complete protection of the animal  
218 following further tumour challenges [8]. Following these experiments, we have recently  
219 demonstrated that depletion of Tregs significantly delays or prevents the development  
220 of tumours using a carcinogen-induced tumour model in mice [9].

221

222 Results arising from murine models led us to explore the role of Tregs in patients with  
223 colorectal cancer. Several studies have observed an increased frequency of Tregs in

224 the peripheral blood of patients with lung, breast, stomach, pancreas and ovarian  
225 malignancies [5]. The presence of Tregs mixed in with the TILs of ovarian cancer has  
226 been associated independently with a poorer prognosis [10]. We have published the  
227 early results of a CRC study which demonstrated that patients had an increased  
228 frequency of Tregs compared to controls, and that these Tregs specifically inhibited  
229 anti-tumour immune responses directed to the TAAs 5T4 (an oncofetal antigen) and  
230 CEA [11].

231  
232 Examination of the composition of TILs in resected advanced CRC from 41 subjects  
233 demonstrated a striking infiltrate of Tregs (Betts et al submitted). We have now  
234 examined changes in Tregs and anti-tumour immune responses in the peripheral  
235 blood of 62 patients undergoing resection of colorectal cancer and followed up for 12  
236 months post-operatively. The findings suggest that the physical presence of CRC  
237 drives the development of a phenotypically distinct Treg population that inhibits anti-  
238 tumour responses (Betts et al submitted); to summarise:

- 239
- 240 • Tregs from patients express significantly higher levels of FoxP3 per cell  
241 compared to controls, as well as increased levels of the integrin CD49d;  
242 these increases *revert to normal* after the tumour is removed.
  - 243 • The frequency of Tregs in blood falls after surgery but returns in subjects  
244 who develop disease recurrences/metastases.
  - 245 • Approximately 60% of patients pre-operatively demonstrate anti-CEA or  
246 5T4 CD4<sup>+</sup> T cell responses but only after Treg depletion *in vitro*.
  - 247 • Post-operatively 90% of patients demonstrate higher frequency CD4<sup>+</sup> T  
248 cell responses and the level of Treg-mediated suppression falls unless the  
249 tumour recurs.
  - 250 • In the group with tumour recurrence at 12 months, 100% of pre-operative  
251 measured anti-tumour immune responses were suppressed by Tregs,  
252 compared to those with no tumour recurrence at 12 months.

253  
254 Considering the striking protection and enhanced anti-tumour immune responses we  
255 see in mice when Tregs are depleted, it seems highly plausible that Tregs in CRC,

256 certainly in advanced disease, are detrimental to patients.

257

258 Our results provide the rationale for this study: reducing the influence of Tregs in  
259 patients with CRC will augment anti-tumour responses and be to the benefit of  
260 patients; this project will explore the means of manipulating the Treg population in vivo  
261 combined with a 5T4 containing vaccine.

262

263 The immunogenicity of pox viruses has been recognised for over a hundred years,  
264 and they have been seen as an attractive vector to vaccinate proteins into a host [12].  
265 TroVax<sup>®</sup> (OxfordBiomedica) uses a modified vaccinia Ankara virus (MVA) which is  
266 attenuated and unable to replicate in the human host cell, yet is still highly  
267 immunogenic. It has already been given to cancer patients to induce immune  
268 responses to the 5T4 protein tumour antigen, and has emerged as a promising new  
269 vaccine candidate [13].

270

271 There have been 4 published phase I/II trials where TroVax<sup>®</sup> was given to patients  
272 with CRC [14]. Minimal side effects were recorded in doses up to  $1 \times 10^9$  TCID<sub>50</sub>. The  
273 most recent study published on TroVax<sup>®</sup> given to 365 renal cell cancer patients used  $1$   
274  $\times 10^9$  TCID<sub>50</sub> with minimal side effects / toxicity [15]. The fact that this dose is well  
275 tolerated and safe provides the rationale for setting the dose level in this trial. TroVax<sup>®</sup>  
276 has been shown to induce both T cell and B cell responses. The serological response  
277 to TroVax<sup>®</sup> indicated by anti-5T4 antibodies has been associated with better hazard  
278 ratio in several phase I/II trials [14]. The mechanism of effect is unknown. Antibodies  
279 may reflect a better T cell response, or may actually be effector molecules in killing  
280 cancer cells.

281

282 Cyclophosphamide is a well-established anti-proliferative agent. It was first shown to  
283 deplete regulatory T cells in murine models in the 1980s. However it has only recently  
284 been shown in humans that low dose cyclophosphamide depletes Tregs and restores  
285 T cell effector function [16, 17]. We envisage risks to be minimal: cyclophosphamide  
286 has been used extensively used for decades and its side effect profile is well

287 described (it has marketing authorisation and a summary of products characteristics  
288 (SmPC)). In this study we are using a 50mg bd metronomic dose.

289

290 Current treatment for the type of patients we will enrol in this trial is “watch and wait”,  
291 following an initial period of palliative chemotherapy to which they have either  
292 responded or had stable disease. This study will assess the efficacy of using either  
293 cyclophosphamide, or TroVax<sup>®</sup>, or both, in a 2x2 factorial design.

294

295 This study will be conducted to ICH-GCP regulatory requirements.

296

## 297 **2 TRIAL OBJECTIVES, ENDPOINTS & DESIGN**

### 298 2.1 Objectives

#### 299 2.1.1. *Primary Objective*

300 i) to measure the effect of treatment with TroVax<sup>®</sup> and/or cyclophosphamide on anti-  
301 tumour immune responses in patients with colorectal cancer.

302

#### 303 2.1.2. *Secondary Objectives*

304 i) to investigate whether there is an improvement in Overall Survival (OS) in the  
305 patients treated with TroVax<sup>®</sup> and/or cyclophosphamide versus not receiving the  
306 experimental therapy

307 ii) to investigate whether Time To Progression (TTP) with death as a competing risk  
308 differs between the TroVax<sup>®</sup> and/or cyclophosphamide versus not receiving the  
309 experimental therapy

310 iii) to investigate whether Progression Free Survival (PFS) differs between the  
311 TroVax<sup>®</sup> and/or cyclophosphamide versus not receiving the experimental therapy

312 iv) to compare adverse events, laboratory measurements and vital sign  
313 measurements among the treatment groups

314 v) to compare the efficacy of Treg depletion in the different groups

315 vi) to explore the relationships between immune response (antibody and cellular  
316 responses against the tumour antigen 5T4 and the MVA viral vector) and clinical  
317 response (progression free survival, overall survival, time to progression, tumour  
318 response)

319

## 320 2.2 Endpoints

### 321 2.2.1 Primary Endpoint

322 i) the magnitude of anti-tumour (5T4) immune responses at week 7

### 323 2.2.2 Secondary Endpoints

324 i) the kinetics of anti-tumour (5T4) immune responses

325 ii) Overall Survival

326 iii) Time To Progression

327 iv) Progression Free Survival

328 v) incidence, nature, severity, relatedness and seriousness of treatment-emergent  
329 adverse events and clinically significant abnormal laboratory results

330 vi) T-reg depletion at week 4

331

## 332 2.3 Trial Design

333 This study will be a randomised open label trial with a 2x2 factorial design, in patients  
334 with inoperable metastatic Colorectal Cancer. This study in patients with advanced  
335 disease will allow us to gather the essential preliminary information on safety,  
336 acceptability, logistic feasibility, and efficacy to help plan and apply for funding of  
337 down-stream phase II/III clinical trials.

338

339 It has been found that patients who are receiving palliative chemotherapy can safely  
340 be given protracted breaks i.e. chemotherapy "holidays" with no evidence of a  
341 worsening of their outcome [18]. However, those patients with elevated platelets at

342 start of chemotherapy did not tolerate chemotherapy-free intervals and therefore they  
343 will be excluded from this study [19].

344

345 Patients with stable or responding disease as defined by RECIST (Response  
346 Evaluation Criteria In Solid Tumours) following 12 weeks standard treatment will be  
347 recruited from clinic, and randomised to one of four groups:

348

349 Group 1: Watch and wait, i.e. no additional treatment unless clinically indicated.

350 Group 2: Metronomic cyclophosphamide.

351 Group 3: Vaccination (i.m.) TroVax<sup>®</sup>.

352 Group 4: Metronomic cyclophosphamide 50mg bd followed by TroVax<sup>®</sup>.

353

354 9 patients will be allocated to group 1, 9 patients will be allocated to group 2

355 18 patients will be allocated to group 3, 18 patients will be allocated to group 4

356

357 Clinical data on patients will be recorded in forms in the Clinical Research Facility.

358

## 2.4 Trial Flowchart (weeks 1-8)

| WEEKS<br>DAY                                    | PR |    | W1         |   | W2 |  | W3         |   | W4 |  | W5 |   | W6 |   | W7 |   | W8 |  |   |
|-------------------------------------------------|----|----|------------|---|----|--|------------|---|----|--|----|---|----|---|----|---|----|--|---|
|                                                 | PR | PT |            |   |    |  |            |   |    |  |    |   |    |   |    |   |    |  |   |
| Group 1: Watch & Wait                           |    |    |            |   |    |  |            |   |    |  |    |   |    |   |    |   |    |  |   |
| Physical exam. / safety check                   | +  | +  |            |   |    |  |            |   | +  |  |    |   |    |   |    |   | +  |  |   |
| Blood test (40m)                                |    | +  |            |   |    |  |            |   | +  |  |    |   |    |   |    |   | +  |  |   |
| CT scan                                         | +  |    |            |   |    |  |            |   |    |  |    |   |    |   |    |   |    |  |   |
| Group 2: Cyclophosphamide                       |    |    |            |   |    |  |            |   |    |  |    |   |    |   |    |   |    |  |   |
| Physical exam. / safety check                   | +  | +  |            |   |    |  |            |   | +  |  |    | + |    |   |    |   | +  |  |   |
| Blood test (40m)                                |    | +  |            |   | +  |  |            | + | +  |  | +  |   |    |   |    | + |    |  |   |
| CT scan                                         | +  |    |            |   |    |  |            |   |    |  |    |   |    |   |    |   |    |  |   |
| Blood for FACS (10ml)                           |    |    |            | + |    |  |            | + |    |  |    |   |    |   |    |   |    |  |   |
| Cyclophosphamide                                |    |    | ██████████ |   |    |  | ██████████ |   |    |  |    |   |    |   |    |   |    |  |   |
| Phone to check safety/compliance                |    |    | ▨          | ▨ |    |  | ▨          | ▨ |    |  |    |   |    |   |    |   |    |  |   |
| Group 3: TroVax <sup>®</sup>                    |    |    |            |   |    |  |            |   |    |  |    |   |    |   |    |   |    |  |   |
| Physical exam. / safety check                   | +  | +  |            |   |    |  |            |   | +  |  |    | + |    |   |    |   | +  |  |   |
| Blood test (40m)                                |    | +  |            |   |    |  |            |   | +  |  |    | + |    |   |    |   | +  |  |   |
| CT scan                                         | +  |    |            |   |    |  |            |   |    |  |    |   |    |   |    |   |    |  |   |
| TroVax <sup>®</sup> injection                   |    |    |            |   |    |  |            |   | ▨  |  |    |   |    | ▨ |    |   |    |  | ▨ |
| Group 4: Cyclophosphamide + TroVax <sup>®</sup> |    |    |            |   |    |  |            |   |    |  |    |   |    |   |    |   |    |  |   |
| Physical exam. / safety check                   | +  | +  |            |   |    |  |            |   | +  |  |    | + |    |   |    |   | +  |  |   |
| Blood test (40m)                                |    | +  |            |   | +  |  |            | + | +  |  | +  |   |    |   |    | + |    |  |   |
| CT scan                                         | +  |    |            |   |    |  |            |   |    |  |    |   |    |   |    |   |    |  |   |
| Blood for FACS (10ml)                           |    |    |            | + |    |  |            | + |    |  |    |   |    |   |    |   |    |  |   |
| Cyclophosphamide                                |    |    | ██████████ |   |    |  | ██████████ |   |    |  |    |   |    |   |    |   |    |  |   |
| Phone to check safety/compliance                |    |    | ▨          | ▨ |    |  | ▨          | ▨ |    |  |    |   |    |   |    |   |    |  |   |
| TroVax <sup>®</sup> injection                   |    |    |            |   |    |  |            |   | ▨  |  |    |   |    | ▨ |    |   |    |  | ▨ |

360  
361  
362  
363  
364  
365  
366  
367  
368  
369  
370

**PR: Pre-recruitment**  
**PT: Pre-treatment**

Bloods are taken BEFORE dosing

 Cyclophosphamide 50mg  
  TroVax<sup>®</sup> i.m 1ml injection  
  Phone check



371 **Trial Flowchart cont. (weeks 9-16)**

372

| WEEKS<br>DAY                                    | W9 |  |  | W10 |  |  | W11 |  |  | W12 |  |  | W13 |  |  | W14 |  |  | W15 |  |  | W16 |  |  |
|-------------------------------------------------|----|--|--|-----|--|--|-----|--|--|-----|--|--|-----|--|--|-----|--|--|-----|--|--|-----|--|--|
|                                                 |    |  |  |     |  |  |     |  |  |     |  |  |     |  |  |     |  |  |     |  |  |     |  |  |
| Group 1: Watch & Wait                           |    |  |  |     |  |  |     |  |  |     |  |  |     |  |  |     |  |  |     |  |  |     |  |  |
| Physical exam. / safety check                   |    |  |  |     |  |  |     |  |  |     |  |  |     |  |  |     |  |  |     |  |  |     |  |  |
| Blood test (40ml)                               |    |  |  |     |  |  |     |  |  |     |  |  |     |  |  |     |  |  |     |  |  |     |  |  |
| CT scan                                         |    |  |  |     |  |  |     |  |  |     |  |  |     |  |  |     |  |  |     |  |  |     |  |  |
| Group 2: Cyclophosphamide                       |    |  |  |     |  |  |     |  |  |     |  |  |     |  |  |     |  |  |     |  |  |     |  |  |
| Physical exam. / safety check                   |    |  |  |     |  |  |     |  |  |     |  |  |     |  |  |     |  |  |     |  |  |     |  |  |
| Blood test (40ml)                               |    |  |  |     |  |  |     |  |  |     |  |  |     |  |  |     |  |  |     |  |  |     |  |  |
| CT scan                                         |    |  |  |     |  |  |     |  |  |     |  |  |     |  |  |     |  |  |     |  |  |     |  |  |
| Group 3: TroVax <sup>®</sup>                    |    |  |  |     |  |  |     |  |  |     |  |  |     |  |  |     |  |  |     |  |  |     |  |  |
| Physical exam. / safety check                   |    |  |  |     |  |  |     |  |  |     |  |  |     |  |  |     |  |  |     |  |  |     |  |  |
| Blood test (40ml)                               |    |  |  |     |  |  |     |  |  |     |  |  |     |  |  |     |  |  |     |  |  |     |  |  |
| CT scan                                         |    |  |  |     |  |  |     |  |  |     |  |  |     |  |  |     |  |  |     |  |  |     |  |  |
| TroVax <sup>®</sup> injection                   |    |  |  |     |  |  |     |  |  |     |  |  |     |  |  |     |  |  |     |  |  |     |  |  |
| Group 4: Cyclophosphamide + TroVax <sup>®</sup> |    |  |  |     |  |  |     |  |  |     |  |  |     |  |  |     |  |  |     |  |  |     |  |  |
| Physical exam. / safety check                   |    |  |  |     |  |  |     |  |  |     |  |  |     |  |  |     |  |  |     |  |  |     |  |  |
| Blood test (40ml)                               |    |  |  |     |  |  |     |  |  |     |  |  |     |  |  |     |  |  |     |  |  |     |  |  |
| CT scan                                         |    |  |  |     |  |  |     |  |  |     |  |  |     |  |  |     |  |  |     |  |  |     |  |  |
| TroVax <sup>®</sup> injection                   |    |  |  |     |  |  |     |  |  |     |  |  |     |  |  |     |  |  |     |  |  |     |  |  |

373

374

375  TroVax<sup>®</sup> i.m 1ml injection

376

377

Blods are taken BEFORE dosing

378

### 3 TRIAL MEDICATION

379

#### 3.1 Investigational Medicinal Product

380

Background information about the format, stability and safety profile of the IMPs used in TaCTiCC is given in Appendix 1.

381

382

383

Cyclophosphamide has been widely used for the treatment of different solid tumours including CRC. In this study we are using much lower doses of cyclophosphamide which has previously been shown to have minimum side effects [16, 17]. Cyclophosphamide tablets of 50mg (Pharmacia Ltd brand) will be purchased by the host institution for use in the trial and stored in the pharmacy clinical trials department. Cyclophosphamide used in this trial will be dispensed from the pharmacy following receipt of a trial-specific prescription and labelled according to the Medicine for Human Use (Clinical Trials) Regulation 2004. Trial subjects will be provided with the exact quantity of cyclophosphamide needed for each treatment course.

384

385

386

387

388

389

390

391

392

393

394

5T4 is an oncofetal antigen expressed in a wide spectrum of cancers but not in most normal tissues, making it an attractive vaccine candidate. It has been expressed in the non-replicating pox virus vector modified vaccinia ankara (MVA) (produced by Oxford BioMedica, trade name TroVax<sup>®</sup>). TroVax<sup>®</sup> is an unlicensed medicinal product that is manufactured, labelled and released by a qualified person in compliance with the Medicine for Human Use (Clinical Trials) Regulation 2004 and Good Manufacturing Practice by Oxford Biomedica before being supplied to the host institution. TroVax<sup>®</sup> is supplied as a lyophilised powder that is stored at 2 to 8°C. TroVax<sup>®</sup> will be stored in the pharmacy clinical trials refrigerator and daily temperature monitoring will be performed. TroVax<sup>®</sup> will be dispensed from the pharmacy following receipt of a trial specific prescription. More details about the handling, storage, reconstitution and disposal are given in Appendix 2.

395

396

397

398

399

400

401

402

403

404

405

406

407 3.2 Dosing Regimen

408 TroVax<sup>®</sup> will be administered by trial nurses with cover by one of the trial clinicians,  
409 whose contact details are shown on page 2. Cyclophosphamide is an oral tablet self-  
410 administered by the patient.

411 Group 1: Watch and wait, i.e. no additional treatment unless clinically indicated

412 Group 2: Metronomic cyclophosphamide 50mg bd as single agent on week 1 (14  
413 doses) and on week 3 (12 doses to make it comparable to group 4).

414 Group 3: Vaccination (i.m.) TroVax<sup>®</sup> ( $1 \times 10^9$  TCID<sub>50</sub>) at week 4, 6, 8, 10, 12 and 16.

415 Group 4: Metronomic cyclophosphamide 50 mg bd on weeks 1 (14 doses) and week  
416 3 (12 doses instead of 14 to allow for extra 24 hour wash-out time),  
417 followed by TroVax<sup>®</sup> ( $1 \times 10^9$  TCID<sub>50</sub>) on weeks 4, 6, 8, 10, 12 and 16.

418

419 TroVax<sup>®</sup> is an i.m. injection administered by clinical staff in the Clinical Research  
420 Facility.  $1 \times 10^9$  TCID<sub>50</sub> in 1 ml will be administered and the patient observed for 60  
421 minutes post injection. The doses will be given every 2 weeks for the first 5  
422 injections, with an additional dose 4 weeks after. If patients receiving Trovax are  
423 within the ranges defined in section 7.3, and are in a stable condition, further  
424 TroVax<sup>®</sup> injections will be offered every 8 weeks.

425

426 Under these conditions, patients may be required to undergo further medical  
427 assessments and provide additional samples in order to monitor ongoing Treg  
428 depletion. The possibility of further investigations under these circumstances is  
429 specifically described in the patient information sheet.

430

431 Patients who responded to cyclophosphamide will be offered a further course/s at a  
432 dose and frequency as previously given. Patients who do receive further trial  
433 medication will be medically assessed as part of their on-going care, and will be  
434 asked to provide additional samples to monitor the effects, as described in the  
435 patient information sheet.

436

437 3.3 Drug accountability

438 The pharmacy department at UHW will develop trial specific prescriptions and  
439 accountability logs for the TroVax<sup>®</sup> and cyclophosphamide and maintain full drug  
440 accountability during the trial.

441

442 3.4 Subject compliance

443 Group 1: Watch and wait. No compliance measures are necessary.

444 Group 2: Metronomic cyclophosphamide. Patients will be contacted by phone during  
445 their treatment course to remind them to take the cyclophosphamide  
446 tablets. Patients will also be reminded to bring back cyclophosphamide  
447 containers to their clinic appointment. Empty/unused tablets will be  
448 returned to pharmacy and unused tablets will be counted by pharmacy  
449 clinical trials staff and recorded in the accountability log.

450 Group 3: Vaccination (i.m.) TroVax<sup>®</sup>. No compliance measures are necessary.

451 Group 4: Metronomic cyclophosphamide followed by TroVax<sup>®</sup>. Patients will be  
452 contacted by phone during their treatment course to remind them to take  
453 the cyclophosphamide tablets. Patients will also be reminded to bring back  
454 cyclophosphamide containers to their clinic appointment. Empty/unused  
455 tablets will be returned to pharmacy and unused tablets will be counted by  
456 pharmacy clinical trials staff and recorded in the accountability log.

457

458 3.5 Concomitant medication

459 Patients should not be receiving cancer chemotherapy at the time of randomisation  
460 and have stable disease (see inclusion / exclusion criteria on sections 4.1 and 4.2).

461 Palliative medication may be given as required by the clinician. Relevant  
462 concomitant medications will be recorded.

463

464        **4            SELECTION & WITHDRAWAL OF TRIAL SUBJECTS**

465        4.1        Inclusion criteria

- 466            • Patient able to give informed consent personally
- 467            • Signed and dated written informed consent
- 468            • Age ≥ 18 years
- 469            • Clinical diagnosis of inoperable colorectal cancer
- 470            • WHO performance status 0-2 (see Appendix 3 for WHO scale
- 471            information)
- 472            • Responding or stable disease as defined by oncologist following 12
- 473            weeks of front-line chemotherapy for metastatic disease, as
- 474            demonstrated on CT scan in comparison with pre-treatment CT scan
- 475            (RECIST), within 4 weeks of trial entry
- 476            • Any cancer related symptoms are under control with standard non-
- 477            chemotherapy medications
- 478            • Subject has adequate bone marrow function as defined by an Absolute
- 479            Lymphocyte Count ≥ 500/μL, Absolute Neutrophil Count >1200/μL,
- 480            Platelet Count >100,000/μL

481

482        4.2        Exclusion criteria

- 483            • Patient unable to give informed consent personally
- 484            • Creatinine level >1.5 Upper Limit of Normal (ULN)
- 485            • Bilirubin level >50 μmol/l
- 486            • Alkaline Phosphatase >3 ULN
- 487            • Aspartate Aminotransferase and Alanine Aminotransferase >2 ULN
- 488            • Prothrombin time >18sec
- 489            • Prior exposure to TroVax<sup>®</sup>
- 490            • Life expectancy of less than 3 months

- 491 • Patient has relapsed
- 492 • Diagnosed as being immunosuppressed, receiving oral steroids (>  
493 prednisolone 10 mg daily) (nasal sprays and inhalers are permitted) or  
494 receiving immunosuppressive therapy for oncology disorders, or  
495 following transplant
- 496 • Patient has completed chemotherapy less than 2 weeks from the start of  
497 the treatment
- 498 • Subject has clinically apparent/active autoimmune disease (prior  
499 confirmed diagnosis or treatment for autoimmune disease including  
500 Systemic Lupus Erythematosus, Grave's disease, active Hashimoto's  
501 thyroiditis, multiple sclerosis, insulin dependent diabetes mellitus and  
502 rheumatoid arthritis). Note: subjects with non-insulin dependent diabetes  
503 mellitus can be included, as can subjects with controlled and rarely  
504 flaring rheumatoid disease and end-stage insulin dependent diabetes  
505 mellitus controlled on insulin.
- 506 • Subject has a platelet count prior to start of chemotherapy >400,000/ $\mu$ L;  
507 Monocytes >80,000/  $\mu$ L; Haemoglobin <11 g/dL
- 508 • Significant cancer related symptoms requiring immediate treatment with  
509 chemotherapy
- 510 • "Currently active" second malignancy, other than non-melanoma skin  
511 cancer and previously diagnosed prostate cancer or breast cancer which  
512 is stable clinically for more than 5 years with or without hormone  
513 treatment. Subjects are not considered to have a "currently active"  
514 malignancy if they have completed therapy more than 5 years previously  
515 and have no known evidence of residual or recurrent disease
- 516 • Evidence of significant clinical disorder or laboratory finding which in the  
517 opinion of the investigating physician makes it undesirable for the patient  
518 to participate in the trial. No participant should have a serious or  
519 uncontrolled intercurrent infection (including those positive for HIV)

- 520 • Psychiatric illnesses/social situations that limit compliance with protocol  
521 requirements
- 522 • Allergy to egg proteins, cyclophosphamide, neomycin or allergic  
523 response to vaccinia vaccines
- 524 • Known cerebral metastases (known from previous investigations or  
525 clinically detectable)
- 526 • Haemorrhagic cystitis
- 527 • Severe infection
- 528 • They are pregnant or lactating.
- 529 • Individuals with the potential of child bearing age and unwilling to take  
530 two forms of contraception

531  
532

#### 533 4.3 Selection of participants

534 At the University Hospital of Wales at any one time, approximately 50 patients are  
535 being treated with palliative chemotherapy for advanced disease. Median survival of  
536 these patients is 16-20 months. In the MRC COIN trial the median disease  
537 progression free survival following completion chemotherapy in the intermittent (arm  
538 C) cohort was 4.6 months [18].

539 Subjects with palliative disease undergoing active treatment are reviewed regularly  
540 in outpatients at the clinical investigators' hospital. Suitable patients will be  
541 approached in clinic and if willing to consider participation, given information sheets.

542

#### 543 4.4 Randomisation procedure

544 Patients will present to one of the collaborators in their clinic, as a part of the  
545 patient's routine clinical assessments. If appropriate, i.e. stable disease after  
546 approximately 12 weeks, patients will undergo a break from chemotherapy ("chemo  
547 holiday"), based on the results of a CT scan and clinical assessment.

548

549 The trial will be introduced to the patient at this point, at the beginning of their chemo  
550 holiday. Patients will be given sufficient time to consider the trial (at least 24 hours),  
551 before providing written consent. The right to withdraw consent at any time will be  
552 re-iterated to the patient.

553

554 The Trials Office will undertake the randomisation using an un-stratified balanced  
555 block design, and communicate the outcome to the collaborator immediately upon  
556 randomisation.

557

#### 558 4.5 Withdrawal of subjects

559 In accordance with the regulations in force, subjects are free to withdraw at any time,  
560 without giving a reason, and without their medical care or legal rights being affected.

561

562 Additionally, patients will be withdrawn from treatment if the CRC disease has  
563 progressed (as defined either by evidence of radiological progression on the  
564 scheduled CT scans or because of clinical deterioration as assessed by the  
565 oncologist) or there appears to be toxicity associated with the trial medication  
566 (please refer to section 7.3 for more details)

567

568 Withdrawn patients will continue their standard follow up care under the oncologists  
569 and their clinical details will be recorded at each clinic visit. They will be followed-up  
570 for pharmacovigilance purposes for 6 months after withdrawal.

571

#### 572 4.6 Expected duration of trial

573 It is suggested that enrolling 54 patients over a 24-30 month period, with a 12 month  
574 follow up period after the final patient entry is a realistic proposition based on current  
575 patient numbers.

576



577  
578  
579  
580  
581  
582  
583  
584  
585  
586  
587  
588  
589  
590  
591  
592  
593  
594  
595  
596  
597  
598  
599  
600  
601  
602  
603  
604  
605

## **5 TRIAL PROCEDURES**

### **5.1 By visit**

Please refer to the table shown in section 2.4 for details of the visit schedule.

In addition to their scheduled visits the patients will be seen regularly by their clinical oncology team.

Patients will be commenced on therapy within 4 weeks of their baseline scan where possible..

If the patient is well enough to attend the Clinical Research Facility, there will be no exclusions to obtaining a blood sample as long as the treating clinician deems the individual well enough to give the sample. All blood samples will be taken before any treatment is given.

### **5.2 Sample collection**

Group 1: 40 ml blood weeks 1, 4, 7 11, 15

Group 2: 40 ml blood weeks 1, 2, 3, 4, 5, 7, 9, 11, 13, 15 (additional 10 ml blood for FACS week 1 and 3)

Group 3: 40 ml blood weeks 1, 4, 5, 7, 9, 11, 13, 15.

Group 4: 40 ml blood weeks 1, 2, 3, 4, 5, 7, 9, 11, 13, 15 (additional 10 ml blood for FACS week 1 and 3)

CT scan of abdomen / chest will be performed as part of the standard clinical care at week 12.

Patients may continue in the clinical trial as long as there is no disease progression as determined by the clinician.

606  
607  
608  
609  
610  
611  
612  
613  
614  
615  
616  
617  
618  
619  
620  
621  
622  
623  
624  
625  
626  
627  
628  
629  
630  
631  
632

### 5.3 Laboratory tests

Full clinical assessment and routine blood tests (including autoantibodies, thyroid function tests and blood glucose at baseline) will be conducted during prior outpatient appointments to ensure eligibility.

Tumour burden will be assessed quantitatively using RECIST criteria at 12-weekly intervals as per standard practice. On clinical evidence of progressive disease, the patients would be treated with standard chemotherapy as indicated.

## 6 ASSESSMENT OF EFFICACY

### 6.1 Primary efficacy parameters

- I. Development or increase in anti-5T4 i) T cell responses ii) B cell responses (antibodies) in patients treated with cyclophosphamide and TroVax<sup>®</sup> versus TroVax<sup>®</sup> alone or cyclophosphamide alone or untreated patients **at week 7**

### 6.2 Secondary efficacy parameters

- I. Development or increase in anti-5T4 i) T cell responses ii) B cell responses (antibodies) in patients treated with cyclophosphamide and TroVax<sup>®</sup> versus TroVax<sup>®</sup> alone or cyclophosphamide alone or untreated patients
- II. Overall Survival as the time in days from randomisation until death of any cause censoring at date of last follow-up
- III. Time To Progression with death as a competing risk will be measured as the time in days from randomisation until disease progression as determined by RECIST criteria for radiological imaging and clinical assessment

- 633 IV. Progression Free Survival will be measured as the time in days from  
634 randomisation until progression or death of any cause censoring at date  
635 of last follow up
- 636 V. Incidence, nature, severity, relatedness and seriousness of treatment-  
637 emergent adverse events and clinically significant abnormal laboratory  
638 results
- 639 VI. Change in the frequency of Tregs measured in blood samples in patients  
640 treated with metronomic cyclophosphamide compared to patients not  
641 receiving cyclophosphamide at week 4

642

### 643 6.3 Procedures for assessing / measuring efficacy parameters

644 From 40 ml blood sample it is expected to obtain at least 25 million PBMCs.  
645 Extraneous peripheral blood mononuclear cells will be frozen for any additional later  
646 analysis. Patients will be consented for storage of samples and subsequent  
647 research.

#### 648 6.3.1 *Primary efficacy parameters*

- 649 I. Measurement of T cell responses **at week 7 time point.** i) IFN $\gamma$   
650 ELISPOT assay will be used to measure *ex vivo* and cultured T cell  
651 responses to tumour antigens and control antigens (TT and PPD  
652 proteins). *Ex vivo* responses will be measured in the presence or  
653 absence of CD4<sup>+</sup>CD25<sup>hi</sup> cells, using methods of depletion devised in  
654 our laboratory. Detailed analysis of cognate CD4<sup>+</sup> / CD8<sup>+</sup> T cell function  
655 will also be performed using the Aria II flow cytometer to simultaneously  
656 analyse intracellular production of IL-2, IFN $\gamma$ , TNF $\alpha$  and IL-10. 6 day  
657 proliferation assays using <sup>3</sup>H-thymidine incorporation will be carried out  
658 using the same cell preparations. To perform these assays will require  
659 approximately 20 million peripheral blood mononuclear cells (PBMCs).
- 660 II. Measurement of anti-5T4 and anti-MVA serum antibody titres **at week 7**

661 **time point** by standard ELISAs (using serum from preparation of above  
662 PBMC sample)

663

664 **6.3.2 Secondary efficacy parameters**

665 I. Kinetics of T and B cell responses will be measured using the methods  
666 detailed in point 6.3.1 at the different time points detailed in section 5.2

667 II. Overall Survival will be obtained subtracting the date of randomisation to  
668 the date of death to obtain the number of days the patient survived after  
669 randomisation

670 III. Time To Progression with death as a competing risk will be obtained  
671 subtracting the date of randomisation to the date of disease progression  
672 to obtain the number of days elapsed from randomisation until  
673 progression of disease

674 IV. Progression Free Survival will be obtained subtracting the randomisation  
675 date to the date of disease progression or death of any cause

676 V. Toxicity will be measured using the NCI CTC (National Cancer Institute  
677 Common Toxicity Criteria) v3 scale; toxicity grading will be recorded in  
678 the patient's CRF.

679 VI. T cell phenotyping and enumeration will be performed by flow cytometry.  
680 T cells will be stained for a variety of markers to assess the effect of  
681 treatment on the phenotype and frequency of different T cell subsets  
682 including Tregs. Markers will include CD4, CD8, CD25, CTLA4,  
683 CD45RA, CD45RO, GITR and Foxp3. Requires maximum of 1 m cells,  
684 and will be combined with the flow cytometry analysis outlined above.

685

686  
687  
688  
689  
690  
691  
692  
693  
694  
695  
696  
697  
698  
699  
700  
701  
702  
703  
704  
705  
706  
707  
708  
709  
710  
711  
712

## 7 ASSESSMENT OF SAFETY

### 7.1 Specification, timing and recording of safety parameters

At regular intervals (specified in section 2.4) the subjects will be screened for the following safety parameters:

- General physical examination (vital signs / heart / lungs / abdomen)
- Full blood count
- Urea and electrolytes
- Liver function tests

The above will be recorded in the patients' case report form (CRF) by the relevant clinician or their nominee.

TroVax<sup>®</sup> has already been safely combined with chemotherapy in patients with colorectal cancer [20]. In this study it will be given sequentially after low dose cyclophosphamide. As this sequential usage is novel, it will therefore be subject to enhanced safety monitoring. Reports of recorded events, with particular emphasis on unexpected grade IV toxicities, along with a narrative from Chief Investigator, will be submitted to the Data Monitoring and Ethics Committee (DMEC) after every 6 completed patients in Group IV. Safety in this group will be assessed weekly for a minimum of the first 4 weeks, following established procedures within the HCTU group.

### 7.2 Adverse event reporting

#### 7.2.1 Definitions

The Medicines for Human Use (Clinical Trials) Regulations 2004 and Amended Regulations 2006 provides the following definitions:

#### Adverse Event (AE)

713 Any untoward medical occurrence in a subject to whom a medicinal product has  
714 been administered including occurrences which are not necessarily caused by or  
715 related to that product.

716

717 Adverse Reaction (AR)

718 Any untoward and unintended response, in a subject, to an investigational medicinal  
719 product, that is related to any dose administered to that subject.

720

721 Unexpected Adverse Reaction (UAR)

722 An adverse reaction the nature and severity of which is not consistent with the  
723 information about the medicinal product in question set out in:

- 724 • the summary of product characteristics (SmPC) for that product (for  
725 products with a marketing authorisation, i.e. cyclophosphamide).
- 726 • the Investigator's Brochure (IB) relating to the trial in question (for any  
727 other investigational product, i.e. TroVax<sup>®</sup>).

728

729 Serious Adverse Event (SAE)

730 Any adverse event, adverse reaction or unexpected adverse reaction, respectively,  
731 that:

- 732 • results in death
- 733 • is life-threatening
- 734 • required hospitalisation or prolongation of existing hospitalisation
- 735 • results in persistent or significant disability or incapacity
- 736 • consists of a congenital anomaly or birth defect

737

738 Suspected Unexpected Serious Adverse Reaction (SUSAR)

739 Any adverse reaction that is classed in nature as serious and which is not consistent  
740 with the information about the medicinal product in question set out

- 741
- in the case of a licensed product, the summary of product characteristics (SmPC) for that product (i.e. cyclophosphamide)
- 742
- In the case of any other investigational medicinal product, the Investigator's Brochure (IB) relating to the trial in question (i.e. TroVax<sup>®</sup>)
- 743
- 744

745 Important medical events that may not be immediately life-threatening or result in  
746 death or hospitalisation but may jeopardise the patient or may require intervention to  
747 prevent one of the other outcomes listed in the definition above should also be  
748 considered serious.

749

750 The patient population being studied in this trial is palliative and it is expected that  
751 >50% will die as a result of their tumour during the study. Death or hospitalisation as  
752 a result of disease progression and other events that are primary or secondary  
753 outcome measures are not considered to be SAEs and should be recorded in the  
754 normal way, in the subjects' CRFs.

755

756 More specifically, the following events **do not** require reporting as SAEs:

- Hospitalisation or prolongation of hospitalisation as a result of progression of disease
  - Death as a result of progression of disease
- 757
- 758
- 759

760

### 761 7.2.2 *Reporting responsibilities*

762 Cardiff University as sponsor have delegated the Sponsor's responsibility for  
763 Pharmacovigilance (as defined in Regulation 5 of the Medicines for Human Use  
764 (Clinical Trials) Regulations 2004) to the HCTU Trials Office.

765

766 Investigators have an obligation to report any SAE (excepting those specified in this  
767 protocol as not requiring reporting in section 7.2.1) that occurs in a subject, within 24  
768 hours, to the Trials Office. Investigators will be asked to record their opinion as to

769 whether the SAE, as defined above, was related to the study medication. This will  
770 also subject to review by the DMEC.

771  
772 Within the TaCTiCC trial, any event that occurs within 30 days of the patient's  
773 treatment and meets the criteria laid out in section 7.2.1 of the protocol should be  
774 reported as an SAE. Beyond this period, any event that is causally linked to  
775 treatment received as part of the trial, and meets the criteria laid out in the protocol,  
776 should also be reported. The immediate report to the Trials Office must be made in  
777 writing using the SAE Report form provided and, if required, the Trials Office will  
778 request further details. Where the event reported consists of, or results in, the death  
779 of a subject, the Sponsor may request further details from the Investigator. Where  
780 the death has been reported to the relevant ethics committee, the committee may  
781 request further details from the Investigator.

782  
783 The Chief Investigator (CI) or their nominee will review and record all SAE reports  
784 received by the Trials Office. The CI will be responsible for reporting the events,  
785 when required, to the MHRA, Ethics and DMEC according to the appropriate  
786 timelines.

787  
788 Suspected unexpected serious adverse reactions (SUSARs) which occur during the  
789 course of the clinical trial will be reported within 7 days of the Trials Office becoming  
790 aware of the event, to the MHRA and the relevant ethics committee. Any additional  
791 relevant information will be sent within eight days of the initial report being sent. All  
792 SUSAR reports or information will be provided to the MHRA using the eSUSAR  
793 reporting system. The relevant research ethics committee will be informed of any  
794 SUSARs using the CIOMS form.

795  
796 In addition to the expedited reporting required for SUSARs, the Trials Office will  
797 periodically submit a safety report to both the MHRA and the relevant Ethics  
798 Committee. This will be annually from the date of the CTA approval. The annual



799 safety report will take into account all new available safety information received  
800 during the reporting period.

801

802 An independent DMEC will be convened to monitor safety and scientific integrity of  
803 the clinical study, to assess risk versus benefit, and to recommend any changes  
804 warranted to the study design. The independent DMEC will meet to review study  
805 data from the clinical database, including safety and primary response data. DMEC  
806 decisions will be recorded as minutes in the Trial Master File. For details about  
807 meetings and composition, please refer to section 9.

808

### 809 7.3 Treatment stopping rules

810 Treatment will be stopped if:

- 811 • Clinical relapse / progression of tumour necessitating a recommencing of  
812 chemotherapy as assessed by clinicians
- 813 • If full blood count falls in indices of >30% then stop experimental therapy  
814 with cyclophosphamide / vaccine
- 815 • If electrolytes and liver function tests increase > 1.5 ULN then stop  
816 active treatment with cyclophosphamide / vaccine

817

## 818 **8 STATISTICS**

819 The trial aims to recruit a total of 54 patients to a 2x2 factorial design. Patients will  
820 be randomised in a 1:1 fashion between receiving cyclophosphamide and not, and in  
821 a 2:1 fashion between receiving TroVax<sup>®</sup> and not. This gives rise to four treatment  
822 arms:

- 823 • watch and wait (9 patients)
- 824 • cyclophosphamide alone (9 patients)
- 825 • TroVax<sup>®</sup> alone (18 patients)
- 826 • TroVax<sup>®</sup> plus cyclophosphamide (18 patients)

827

828 Comparisons of TroVax<sup>®</sup> versus not and cyclophosphamide versus not will be  
829 performed stratified for the other treatment allocation, and interactions between the  
830 treatments will be specifically tested for.

831  
832 Consequently 5 out of every 6 patients will receive some experimental therapy.  
833 Overall 36 patients will receive TroVax<sup>®</sup> versus 18 receiving none, and 27 will  
834 receive cyclophosphamide versus 27 receiving none.

835  
836 Both the cyclophosphamide and TroVax<sup>®</sup> randomisation will recruit 18 patients to  
837 each arm. Based on the primary endpoints, this gives greater than 80% power to  
838 detect a difference of one standard deviation<sup>3</sup> in measured T/B cell responses at  
839  $p < 0.05$ . Alternatively there will be 80% power to detect a 50% absolute difference in  
840 the proportion of responders (e.g. from 25% to 75%).

841

## 842 8.1 Sample size

843 Two comparisons will be carried out, and power is based on the average effect size  
844 expected for each treatment (allowing for the possible synergy between the two  
845 treatments). All tests will be carried out at the 5% significance level. A randomisation  
846 of 27 vs 27 patients to receive cyclophosphamide or not gives 80% power to detect  
847 a moderate to large difference of 0.8 s.d. in antitumour response, or other laboratory  
848 markers. For the TroVax<sup>®</sup> randomisation, a total of 54 patients (allocated as 36 vs  
849 18) gives 80% power to detect a difference of 0.83 points between TroVax<sup>®</sup> and  
850 placebo. This would be equivalent to a difference of 1 sd for TroVax<sup>®</sup> +  
851 cyclophosphamide vs cyclophosphamide and a smaller difference of 1/3 s.d. for  
852 TroVax<sup>®</sup> alone versus watch and wait, or 1.25 s.d. in the cyclophosphamide group  
853 and no difference in the no cyclophosphamide group. As the possible synergy  
854 between cyclophosphamide and TroVax<sup>®</sup> is of interest, the TroVax<sup>®</sup> randomisation is

---

<sup>3</sup> In a cohort of > 50 patients studied pre-operatively the mean 5T4 T cell response before / after in vitro Treg depletion is 7.15 (SD 1.7) vs. 16.0 (SD 2.9) T cells / million PBMCs. We expect the responses generated by vaccination to be far more robust in the light of previous phase I/II studies giving TroVax<sup>®</sup> to CRC patients. An increase of at least 1 SD is expected if Treg depletion in vivo is successful. Frequency of Tregs in this population is approximately 1-3 % of CD4+ T cells in PBMCs and we have previously measured a significant increase in patients vs. age matched controls [11].

855 in a ratio of 2:1; if such synergy is seen, then a comparison of adding  
856 cyclophosphamide to TroVax<sup>®</sup> will contain 36 patients, enough to see a 1 s.d.  
857 difference with 80% power.

858

## 859 8.2 Randomisation

860 The trial will be open label; given the objective nature of the measurements, this is  
861 unlikely to introduce bias. Randomisation will be by means of a fax and a telephone  
862 call to the trials office. Allocation will be performed using a balanced-block  
863 randomisation without stratification.

864

## 865 8.3 Analysis

866 Continuous variables will be analysed using standard t-tests, regression approaches  
867 (for stratified and multivariable analyses) or Wilcoxon rank-sum tests as appropriate.  
868 Proportions will be compared using the Mantel-Haenszel test. Where possible, effect  
869 sizes and confidence intervals will be given. The primary analysis of treatment effect  
870 for each treatment will be performed stratified for the other treatment allocated, and  
871 a test for interaction performed. However, because of the well-known problems with  
872 subgroup analyses, and given the small numbers, any analyses based on other  
873 baseline covariates will be purely exploratory and hypothesis-generating, and  
874 suitable standard tests for heterogeneity and trend will be used throughout.

875

876 Analyses will be by intention to treat – there will be no imputation performed for  
877 missing data.

878

## 879 **9 DATA MONITORING & ETHICS COMMITTEE**

880 Data will be provided to the Data Monitoring and Ethics Committee (DMEC) by the  
881 Chief Investigator and the study's statistician. The DMEC will examine the  
882 accumulating safety and efficacy data from the trial. Their remit may include  
883 recommending trial closure on safety grounds. Because the outcome measures

884 chosen here are surrogates, and given the small size of the trial, there are no formal  
885 provisions to stop the trial early because of efficacy. After each meeting they will  
886 write a letter giving recommendations to the Sponsor.

887

888 The DMEC will be composed of the following members:

889

890 • Dr John Staffurth, Institute of Cancer and Genetics, School of Medicine,  
891 Cardiff University

892 • Prof Alan Burnett, Department of Haematology, Cardiff University

893 • Prof Tim Elliot, Chair of Experimental Oncology and Associate Dean for the  
894 Faculty of Medicine, University of Southampton

895

## 896 **10 DIRECT ACCESS TO SOURCE DATA AND DOCUMENTS**

897 The Investigator will permit trial-related monitoring, audits, GTAC review, and  
898 regulatory inspections (where appropriate) by providing direct access to source data  
899 and other documents (i.e. patients' case sheets, blood test reports, CT-scan reports,  
900 histology reports etc). Patients will provide specific consent to grant access to these  
901 data.

902

## 903 **11 ETHICS & REGULATORY APPROVALS**

904 The trial will be conducted in compliance with the principles of the Declaration of  
905 Helsinki (1996), the principles of GCP and in accordance with all applicable  
906 regulatory requirements, including but not limited to, the Research Governance  
907 Framework and the Medicines for Human Use (Clinical Trial) Regulations 2004, as  
908 amended in 2006 and any subsequent amendments.

909

910 This protocol and related documents will be submitted for review to the Sponsor and  
911 the Gene Therapy Advisory Committee (GTAC) for ethical approval, and to the

912 Medicines and Healthcare products Regulatory Agency (MHRA) for Clinical Trial  
913 Authorisation.

914

915 Annual progress and safety reports and a final report at conclusion of the trial will be  
916 submitted to GTAC and the MHRA within the timelines defined in the Regulations.

917

## 918 **12 QUALITY ASSURANCE**

919 The Trials Office has experience in the conduct and management of clinical trials  
920 across the phases, and will adhere to standard operating procedures (SOPs), both  
921 generic and study-specific, during the conduct of this trial.

922

923 Collection, retention and entry of source data at the Clinical Research Facility on the  
924 Heath Park Campus will also be carried out to developed clinical trials practices.

925 An element of source data verification (SDV) may be required during the trial, in  
926 order to present data to the DMEC. The procedure for SDV will be outlined in a trial-  
927 specific SOP, with reference to the requirements of the Sponsor.

928

## 929 **13 DATA HANDLING**

930 The Chief Investigator will act as custodian for the trial data. Data will be retained  
931 and handled with strict adherence to Cardiff University Research Governance  
932 Framework. More specifically:

933

- patient data will be anonymised
- all anonymised data will be stored on a password protected computer
- all trial data will be stored and archived in line with the Medicines for  
936 Human Use (Clinical Trials) Amended Regulations 2006

937 Archiving will be done in accordance with Cardiff University archiving policy.

938

939

## **14 PUBLICATION POLICY**

940

It is intended that the results of the study will be reported and disseminated at international conferences and in peer-reviewed scientific journals. The patients will be consented to publish their anonymised data only, and will be informed when a publication is imminent.

944

945

## **15 FINANCIAL ASPECTS AND INSURANCE**

946

Oxford Biomedica will provide investigational medicinal product (TroVax<sup>®</sup>) and funding for laboratory aspects, in support of the trial.

947

948

949

Insurance for aspects of the trial are provided by the Sponsor's clinical trial indemnity.

950

951

952

953

## 16 REFERENCES

954

- 955 1. Dunn, G.P., et al., Cancer immunoediting: from immunosurveillance to tumor escape.[see  
956 comment]. *Nature Immunology*, 2002. 3(11): p. 991-8.
- 957 2. Penn, I., Posttransplant malignancies. *Transplantation Proceedings* 1999. 31(1-2): p. 1260-  
958 2.
- 959 3. Godkin, A. and A. Gallimore, CD4+CD25+ regulatory T cells and tumour immunity-  
960 observations in mice and men. *Immunology* 2008. 123(2): p. 157-63.
- 961 4. Galon, J., et al., Type, density and location of immune cells within human colorectal tumors  
962 predict clinical outcome. *Science* 2006. 313(5795): p. 1868-9.
- 963 5. Dudley, M.E., et al., Cancer regression and autoimmunity in patients after clonal  
964 repopulation with antitumor lymphocytes. *Science* 2002, 298(5594): p. 850-4.
- 965 6. Hunder, N.N., et al., Treatment of metastatic melanoma with autologous CD4+ T cells  
966 against NY-ESO-1. *N Engl J Med* 2008. 358(25): p. 2698-703.
- 967 7. Sakaguchi, S., Naturally arising Foxp3-expressing CD25+CD4+ regulatory T cells in  
968 immunological tolerance to self and non-self. *Nature Immunology* 2005. 6(4): p. 345-52.
- 969 8. Jones, E., et al., Depletion of CD25+ regulatory cells results in suppression of melanoma  
970 growth and induction of autoreactivity in mice. *Cancer Immunity* 2002. 2(1): p. 22.
- 971 9. Betts, G., et al., The impact of regulatory T cells on carcinogen-induced sarcomagenesis. *Br J*  
972 *Cancer* 2007. 96(12): p. 1849-54.
- 973 10. Curiel, T.J., et al., Specific recruitment of regulatory T cells in ovarian carcinoma fosters  
974 immune privilege and predicts reduced survival.[see comment]. *Nature Medicine* 2004.  
975 10(9): p. 942-9.
- 976 11. Clarke, S.L., et al., CD4+CD25+FOXP3+ regulatory T cells suppress anti-tumor immune  
977 responses in patients with colorectal cancer. *PLoS ONE* 2006. 1: p. e129.
- 978 12. Mackett, M., et al., Vaccinia virus: a selectable eukaryotic cloning and expression vector.  
979 *Proc. Natl. Acad. Sci. USA*. 1982. 79: 7415-7419.
- 980 13. Amato R.J. 5T4-modified vaccinia Ankara: progress in tumor-associated antigen-based  
981 immunotherapy. *Expert Opin Biol Ther*. 2010. Feb;10(2):281-7. Review.
- 982 14. Harrop, et al., Cross-trial analysis of immunologic and clinical data resulting from Phase I  
983 and II trials of MVA-5T4 (TroVax) in colorectal, renal and prostate cancer patients. *J*  
984 *Immunother*. 2010. 33(9): 999-1005.

- 985 15 Amato R. J., et al., Vaccination of metastatic renal cancer patients with MVA-5T4: a  
986 randomized, double-blind, placebo-controlled Phase III study. *Clin Cancer Res.* 2010.  
987 16(22): 5539-47.
- 988 16. Ghiringhelli, et al., Metronomic cyclophosphamide regimen selectively depletes  
989 CD4+CD25+ regulatory T cells and restores T and NK effector functions in end stage  
990 cancer patients. *Immunotherapy* 2007, 56(5):641-8.
- 991 17 Viaud et al., Cyclophosphamide induces differentiation of Th17 cells in cancer patients.  
992 *Cancer Res.* 2010. 71(3): 661-5
- 993 18. Maughan et al., Comparison of intermittent and continuous palliative chemotherapy for  
994 advanced colorectal cancer: a multicentre randomised trial. *Lancet* 2003, 361(9356):457-64.
- 995 19. Adams R, Wilson R, Seymour M, Meade AM, Madi A, Cassidy J, Fisher D, Kenny S,  
996 Kaplan R, Maughan TS on behalf of the COIN Trial Investigators. Intermittent vs continuous  
997 oxaliplatin-fluoropyrimidine (Ox-Fp) chemotherapy (CT) in first-line treatment of patients  
998 (pts) with advanced colorectal cancer (aCRC): predictive factors (PF), Quality of Life (QL)  
999 and final efficacy results from the MRC COIN trial. ASCO Annual Meeting 2010, Abstract  
1000 Number 53047
- 1001 20 Harrop et al. Vaccination of colorectal cancer patients with TroVax given alongside  
1002 chemotherapy (5-fluorouracil, leukovorin and irinotecan) is safe and induces potent immune  
1003 responses. *Cancer Immunol Immunother.* 2008; 57(7): 977-86  
1004  
1005



1006  
1007  
1008  
1009  
1010  
1011  
1012  
1013  
1014  
1015  
1016  
1017  
1018  
1019  
1020  
1021  
1022

**17 SIGNATORIES**

*Chief Investigator: Dr Andy Godkin*

Signature: \_\_\_\_\_ Date: \_\_\_\_\_

*Statistician: Dr Robert Hills*

Signature: \_\_\_\_\_ Date: \_\_\_\_\_

1023 **APPENDIX 1      Preparation, Administration and Handling of Investigational**  
1024 **Medicinal Products**

1025

1026 **Cyclophosphamide Tablets 50 mg (Pharmacia Limited)**

1027

1028 Cyclophosphamide is supplied as white polyethylene containers with polyethylene snap-caps,  
1029 containing a white capsule of desiccant. Cyclophosphamide is an alkylating, antineoplastic agent.  
1030 Cyclophosphamide has been used successfully to induce and maintain regressions in a wide range of  
1031 neoplastic conditions, including leukaemias, lymphomas, soft tissue and osteogenic sarcomas,  
1032 paediatric malignancies and adult solid tumours; in particular, breast and lung carcinomas.

1033

1034 **Posology and method of administration**

1035 Route of administration: Oral.

1036

1037 In this study we are using a metronomic dose of 50mg bd.

1038

1039 Cyclophosphamide tablets should be swallowed whole, preferably on an empty stomach, but if gastric  
1040 irritation is severe, they may be taken with meals. With the very low dose of drug used in this study,  
1041 side effects (i.e. urinary tract etc) are unlikely, but the patient should be well hydrated and maintained  
1042 in fluid balance.

1043

1044 The patient should be well hydrated and maintained in fluid balance.

1045

1046 Mesna (Uromitexan) can be used concurrently with cyclophosphamide to reduce urotoxic effects (for  
1047 dosage see Uromitexan data sheet). If Mesna (Uromitexan) is used to reduce urothelial toxicity,  
1048 frequent emptying of the bladder should be avoided.

1049

1050 Due to the reduced dose of this study, we do not expect that the patients develop haematological  
1051 toxicity. However, may the leucocyte count be below 4,000/mm<sup>3</sup> or the platelet count below  
1052 100,000/mm<sup>3</sup>, treatment with cyclophosphamide should be temporarily withheld until the blood count  
1053 returns to normal levels.

1054

1055 **Contraindications**

1056 Cyclophosphamide is contraindicated in patients with hypersensitivity and haemorrhagic cystitis.

1057

1058 **Special warnings and precautions for use**

1059 Cyclophosphamide should be withheld in the presence of severe bone marrow depression. Regular  
1060 blood counts should be performed in patients receiving cyclophosphamide.

1061 It should not normally be given to patients with severe infections and should be withdrawn if such  
1062 infections become life threatening.

1063

1064 Cyclophosphamide should be used with caution in debilitated patients and those with renal and/or  
1065 hepatic failure.

1066

1067 Cyclophosphamide should be used only under the directions of physicians experienced in cytotoxic or  
1068 immunosuppressant therapy.

1069

1070 This product should not normally be administered to patients who are pregnant or to mothers who are  
1071 breast feeding. Alkylating agents, including cyclophosphamide, have been shown to possess  
1072 mutagenic, teratogenic and carcinogenic potential. Pregnancy should therefore be avoided by  
1073 appropriate means during cyclophosphamide therapy and for three months thereafter.

1074

1075 Although it is less likely with the patient demography in this study, if appropriate males receiving  
1076 cyclophosphamide will have the hazards explained, and the necessity of contraception upto 3 months  
1077 after ceasing treatment.

1078

1079 **Overdose**

1080 Myelosuppression (particularly granulocytopenia) and haemorrhagic cystitis are the most serious  
1081 consequences of overdosage. Recovery from myelosuppression will occur by the 21st day after the  
1082 overdosage in the great majority of patients (at doses up to 200 mg/kg i.v.) while granulocytopenia is  
1083 usually seen by day 6 and lasts for a mean period of 12 days (up to 18 days). A broad spectrum  
1084 antibiotic may be administered until recovery occurs. Transfusion of whole-blood, platelets or white  
1085 cells and reverse barrier nursing may be necessary.

1086

1087 If the drug has been taken in the form of tablets, early gastric lavage may reduce the amount of drug  
1088 absorbed.

1089

1090 During the first 24 hours and possibly up to 48 hours after overdosage, i.v. Mensa may be beneficial  
1091 in ameliorating damage to the urinary system. Normal supportive measures such as analgesics and  
1092 maintenance of fluid balance should be instituted. If the cystitis does not resolve more intensive  
1093 treatment may be necessary.

1094

1095 No further courses should be given until the patient has fully recovered.

1096

1097 **Storage and Shelf life**

1098 36 months. Do not store above 25°C. Store in the original container in order to protect from moisture.

1099

1100 **TroVax® (Oxford BioMedica)**

1101

1102 The TroVax® active substance is a highly attenuated recombinant vaccinia virus that contains a gene  
1103 encoding the human 5T4 oncofetal antigen. The vector is derived from a replication-incompetent  
1104 vaccinia virus called "MVA" that was developed and used as a safe vaccine for smallpox. MVA cannot  
1105 replicate to produce infectious virus in any primary human cell type. TroVax® is formulated as a  
1106 lyophilized powder and reconstituted in sterile water for injection prior to administration. It is  
1107 administered as an i.m. injection (for more information on handling and administration see App. 2).

1108

1109 **Undesirable Effects**

1110 The only adverse reactions consistently attributed to TroVax® are self limiting febrile reactions and  
1111 mild injection site reactions.

1112

1113 **Contraindications**

1114 TroVax® is currently contraindicated in women of child-bearing potential and in patients who are  
1115 allergic to egg protein and/or exhibit sensitivity to neomycin and/or have active eczema with lesion(s)  
1116 on the skin. It is also contraindicated in patients who are clinically immunosuppressed or who take  
1117 corticosteroids or other immunosuppressant agents.

1118

1119 Pregnant or lactating patients must not receive TroVax®. Likewise, personnel who are pregnant  
1120 should not handle TroVax® or waste contaminated with TroVax®. Personnel of child bearing  
1121 potential should be informed of the potential risk. Personnel who are immunologically  
1122 compromised should also not handle TroVax® or waste contaminated with TroVax®.

1123

1124 In addition, since the placenta expresses 5T4, TroVax® could potentially induce antibodies that  
1125 might harm fetal growth and development. These phenomena have not been observed, however  
1126 women of child bearing potential should only be given TroVax® if the clinical benefit:risk  
1127 assessment is favourable. Two reliable methods of contraception should be used during treatment  
1128 with TroVax® and continued for an appropriate length of time afterwards; one month for male  
1129 patients and three months for female patients. If pregnancy should occur, treatment with TroVax®

1130 should be suspended.

1131

1132 **Overdosage**

1133 TroVax<sup>®</sup> has been given to animals in multiples of up to 280 times the clinical dose, based on pfu/kg,  
1134 without toxic effects. Overdosage has not been documented in humans.

1135

1136 **Storage and Shelf Life**

1137 TroVax<sup>®</sup> is presented as a sterile powder in 2 ml glass vials with 13 mm rubber stopper and combi  
1138 caps. Specifications for the container and closure system are in compliance with International  
1139 Conference on Harmonization (ICH) guidelines. The container and closure have been validated to  
1140 demonstrate the integrity of closure and its effectiveness as a microbial barrier. The bottles and  
1141 stoppers are suitable for the proposed storage conditions at  $\leq -15^{\circ}\text{C}$  for 12 months then at  $2-8^{\circ}\text{C}$  for  
1142 12 months. Once TroVax<sup>®</sup> is re-constituted, it is stable at room temperature for 4 hours. Reconstituted  
1143 product that has been prepared beyond this time limit should be discarded.

1144

1145 The TroVax<sup>®</sup> drug product is formulated in mannitol stabilizer and lyophilized, and is presented as a  
1146 lyophilate, which is stored at  $\leq -15^{\circ}\text{C}$  for a period of up to 12 months at the distributor's facilities, then  
1147 is shipped at  $2-8^{\circ}\text{C}$  and is stable for up to 12 months further.

1148

1149 **APPENDIX 2 Instructions for the Handling, Storage, Reconstitution and**  
1150 **Disposal of TroVax®**

1151

1152 TroVax® will be supplied by Oxford BioMedica U.K. Ltd.

1153

1154 The Investigator and the study site are responsible for investigational product accountability. All  
1155 clinical study supplies that are delivered will be the responsibility of a suitably qualified and authorized  
1156 person such as a hospital research pharmacist, who will document drug disposition and accountability  
1157 for the duration of the trial.

1158

1159 Investigators and pharmacists should note that the clinical study supplies may only be used for the  
1160 clinical study for which they are indicated. They must not be employed for any other study, whether  
1161 of TroVax® or not, or for any other clinical use.

1162

1163 Additional information may be found in the current version of the Investigators Brochure.

1164

1165 **Packaging and labelling**

1166 Packaging and labelling will be in accordance with Good Manufacturing Practice (GMP) for clinical  
1167 trials.

1168 Each vial will bear a label conforming to national regulations for an Investigational Medicinal Product.

1169 The outer carton labelling will also bear a label conforming to national regulations for an  
1170 Investigational Medicinal Product.

1171

1172 **Storage and disposition of study medications**

1173 TroVax® must be stored in a locked refrigerator between 2°C to 8°C in the hospital pharmacy, or  
1174 other comparable secure location. A temperature log should be maintained and monitored. TroVax®  
1175 must be stored in such a way that it cannot be mixed up or confused with other medications, be they  
1176 clinical trial supplies or medicines for routine clinical use.

1177 Dispensing will be documented by completing a log with the date of dispensing and the subject  
1178 details.

1179

1180 After notification from the sponsor all expired/unused/used vials will be destroyed on site in  
1181 accordance with procedures for destruction of genetically modified waste and destruction will be  
1182 documented appropriately.

### 1183 **Administration of TroVax<sup>®</sup>**

1184 TroVax<sup>®</sup> is administered at a dose of  $1 \times 10^9$  TCID<sub>50</sub>/mL in 1mL by intramuscular injection into the  
1185 deltoid muscle of the upper arm. It is advised to alternate the arm in which TroVax<sup>®</sup> is injected at  
1186 each cycle.

1187  
1188 All subjects will receive the treatment in a side-room away from contact with other subjects. The  
1189 formulation will be delivered to this side-room. TroVax<sup>®</sup> is presented as lyophilized material. Detailed  
1190 instructions will be provided to the pharmacist for reconstitution. TroVax<sup>®</sup> must be re-suspended by  
1191 adding 1.2 ml of water for injection. The resulting solution will appear opalescent. One ml volume of  
1192 the solution is then withdrawn into a syringe and injected into the subject.

1193  
1194 UNDER NO CIRCUMSTANCES MUST THE RECONSTITUTED MATERIAL BE ALLOWED TO  
1195 STAND FOR MORE THAN FOUR HOURS AT ROOM TEMPERATURE. IF THIS DOES OCCUR,  
1196 THE MATERIAL MUST BE DESTROYED AND A COMMENT MUST BE RECORDED IN THE  
1197 PHARMACY FILE FOR ACCOUNTABILITY PURPOSES.

### 1198 1199 **Handling and Disposal**

1200 Procedures for proper handling and disposal of anticancer drugs should conform to hospital  
1201 procedures, guidelines and approved Biosafety SOPs. It is recommended to store used vials in  
1202 labelled biohazard bags or disposed of by incineration or other such method approved by the local  
1203 procedures only after drug accountability has been performed.

1204  
1205 All healthcare staff handling TroVax<sup>®</sup> or materials contaminated by it must wear an apron, gloves, a  
1206 mask and protective goggles. Pregnant nurses must not handle either TroVax<sup>®</sup> or materials  
1207 contaminated by TroVax<sup>®</sup>.

### 1208 1209 **Precautions/overdose**

1210 TroVax<sup>®</sup> is contraindicated in subjects who have previously had hypersensitive reactions to vaccinia  
1211 vaccinations, egg proteins or to neomycin. In previous studies, the only consistent side effects of  
1212 TroVax<sup>®</sup> were influenza-like symptoms and mild injection site reactions.

1213

1214 Subjects should remain under medical observation for one hour following injection with TroVax<sup>®</sup>.  
1215 Adequate treatment provisions, including epinephrine injection (1:1000), should be available for  
1216 immediate use should an anaphylactic reaction occur.

1217 TroVax<sup>®</sup> is also contraindicated in subjects who are pregnant or lactating. Although highly unlikely, it  
1218 is possible that an autoimmune response against the pituitary could occur since this organ stained  
1219 positively for 5T4 in in vitro experiments. The Investigators should be alert to the possibility of pituitary  
1220 insufficiency or failure.

1221

1222 No cases of TroVax<sup>®</sup> overdose have been reported. No active medical intervention is known to be  
1223 required in the event of an overdose. The subject should be observed for as long as is considered  
1224 appropriate by the Investigator based on the subject's clinical condition and supportive care given if  
1225 required.

1226

1227

1228

1229

1230



1231 **APPENDIX 3** **WHO Performance Status**

1232

1233 0 - Asymptomatic (Fully active, able to carry on all predisease activities without restriction)

1234 1 - Symptomatic but completely ambulatory (Restricted in physically strenuous activity but ambulatory  
1235 and able to carry out work of a light or sedentary nature. For example, light housework, office work)

1236 2 - Symptomatic, <50% in bed during the day (Ambulatory and capable of all self care but unable to  
1237 carry out any work activities. Up and about more than 50% of waking hours)

1238 3 - Symptomatic, >50% in bed, but not bedbound (Capable of only limited self-care, confined to bed  
1239 or chair 50% or more of waking hours)

1240 4 - Bedbound (Completely disabled. Cannot carry on any self-care. Totally confined to bed or chair)

1241 5 - Death

1242

1243

1244

1245
